# Supplementary material for: A single residue can modulate nanocage assembly in salt dependent ferritin
Source: Royal Society of Chemistry journal article supplement (doi:10.1039/d1nr01632f), 2021-01-01
Supplement: d1nr01632f2.zip [file d1nr01632f2.zip]

Archive with 7 entries (7 files):
- New folder (2)/6TXH_D_1292105808_val-report-full_P1.pdf
- New folder (2)/6TXI_D_1292105873_val-report-full_P1.pdf
- New folder (2)/6TXJ_D_1292105921_val-report-full_P1.pdf
- New folder (2)/6TXK_D_1292105922_val-report-full_P1.pdf
- New folder (2)/6TXL_D_1292105924_val-report-full_P1.pdf
- New folder (2)/6TXM_D_1292105925_val-report-full_P1.pdf
- New folder (2)/CheckCIF_information_2021-04-27_17-26.pdf
