# Supplementary material for: A single residue can modulate nanocage assembly in salt dependent ferritin
Source: Royal Society of Chemistry journal article supplement (doi:10.1039/d1nr01632f), 2021-01-01
Supplement: d1nr01632f2.zip [file d1nr01632f2.zip › New folder (2)/CheckCIF_information_2021-04-27_17-26.pdf]

## CheckCIF

Dear Editor,

The submission website asks the following:

*CheckCIF reports for any crystal structures. Please ensure that any cif files have been deposited with the Cambridge Crystallographic Data Centre (CCDC) via*

*[http://www.ccdc.cam.ac.uk/services/structure\\_deposit](http://www.ccdc.cam.ac.uk/services/structure_deposit) prior to submission*

This is for small molecule data and not protein structures as we have solved. We have deposited our structures in the pdb and provided pdb codes. We have also provided the validation check data as part of the submission to the journal. I hope this meets your requirements.

Jonathan Heddle
